# Supplementary figures and images for: Variability of Zika Virus Incubation Period in Humans
Source: PubMed Central journal article supplement — Open Forum Infect Dis. 2018 Oct 12;5(11):ofy261. doi: 10.1093/ofid/ofy261 (PMC6207619; doi:10.1093/ofid/ofy261), 2018-10-12

Individuals

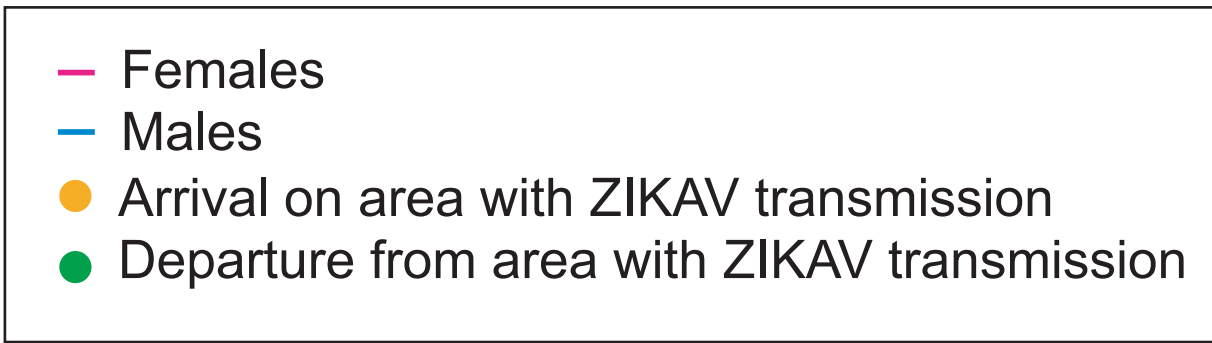

-200

-150

-100

-50

0

Time (days)

Onset of symptoms

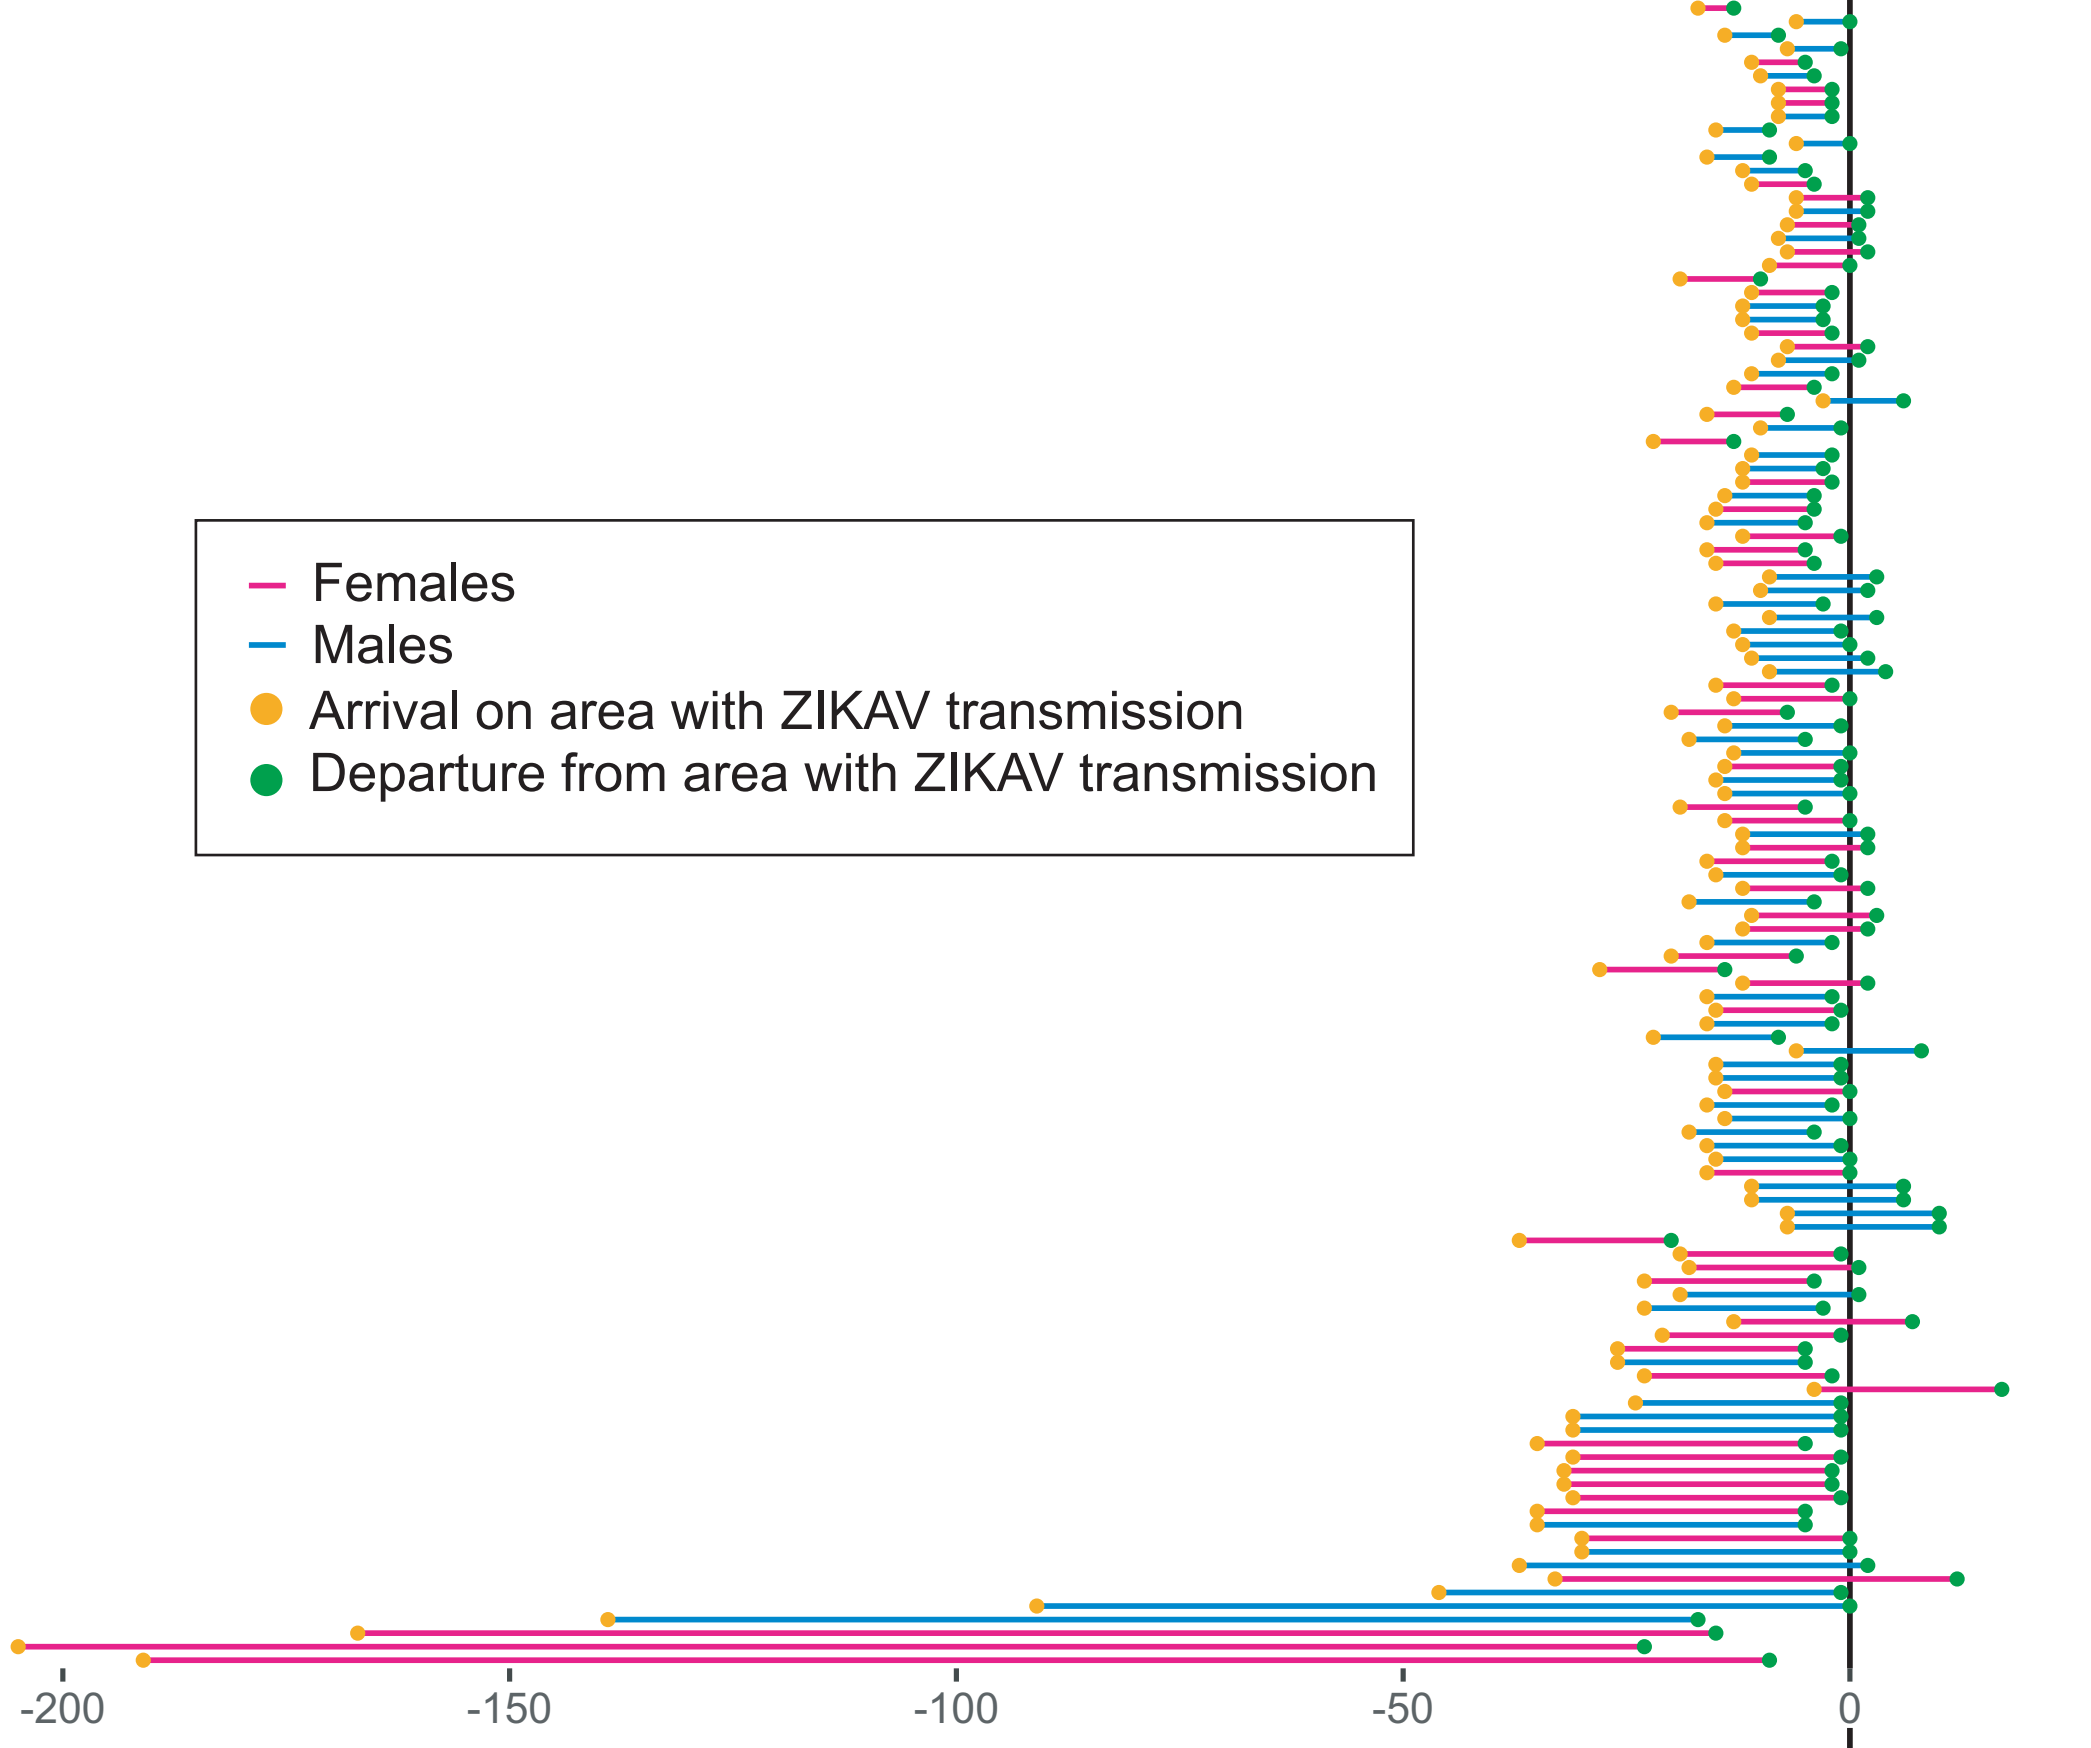

Supplement: ofy261_suppl_supplementary_figure_1.pdf [file ofy261_suppl_supplementary_figure_1.pdf]
